# Supplementary material
Source: PubMed Central journal article supplement (PMC10234282)

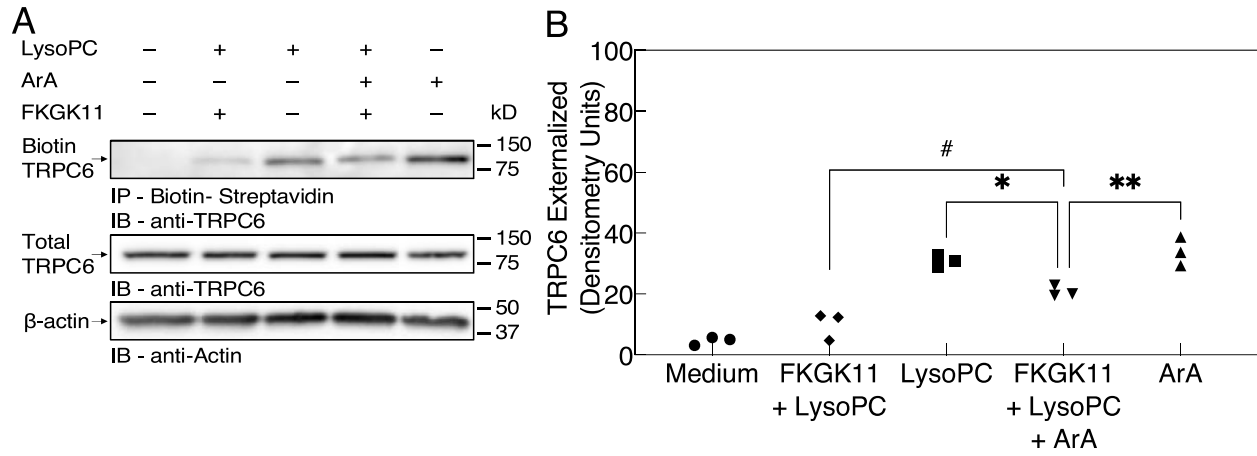

Supplementary figure S1.

Supplement: NIHMS1889701-supplement-1.pdf [file NIHMS1889701-supplement-1.pdf]
